# Supplementary material for: MDRL lncRNA Regulates the Processing of miR-484 Primary Transcript by Targeting miR-361
Source: PubMed Central journal article supplement (PMC4109843; doi:10.1371/journal.pgen.1004467), 2014-07-24

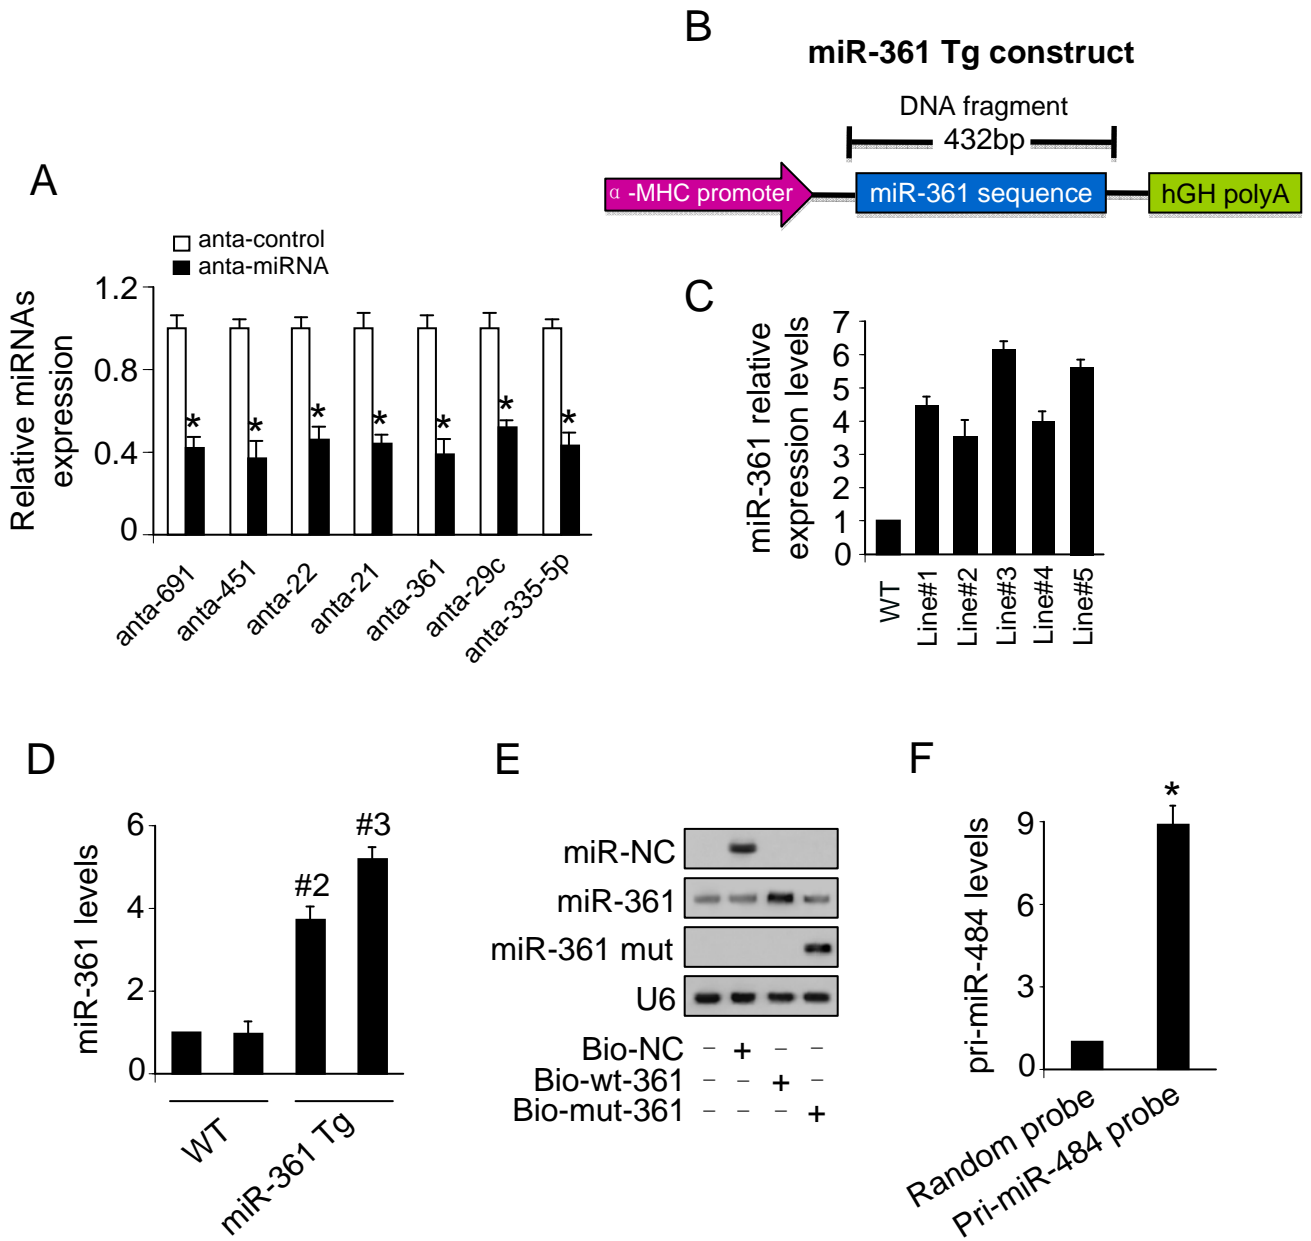

Supplement: pgen.1004467.s001.pdf [file pgen.1004467.s001.pdf]
